# Supplementary material for: Advanced Molecular Characterisation in Relapsed and Refractory Paediatric Acute Leukaemia, the Key for Personalised Medicine
Source: MDPI journal article supplement (doi:10.3390/jpm12060881), 2022-05-27
Supplement: s1 [file s1]

**Supplementary Table S3:** Summary of the advanced molecular characterization performed in the analysed samples

| PATIENT ID | DISEASE | STATUS | KARYOTYPE <sup>1</sup> | REARRANGEMENTS   | CNAs                                                                                                            | GENE OVEREXPRESSION | VARIANTS IDENTIFIED BY NGS                                                                                                                                                         | PANEL VERSION | % BLASTS | VAF                  | DEPTH                  | AMP CLASS     | TIER              |
|------------|---------|--------|------------------------|------------------|-----------------------------------------------------------------------------------------------------------------|---------------------|------------------------------------------------------------------------------------------------------------------------------------------------------------------------------------|---------------|----------|----------------------|------------------------|---------------|-------------------|
| HRL 1      | MPL     | D      | complex                | <i>E2A-other</i> | Del. in <i>CDKN2A/B</i> , and <i>GBE1</i> .<br>Dup. in <i>EBF1</i> .                                            | <i>WT1</i>          | <i>FLT3</i> NM_004119.2:c.2516A>G(p.Asp839Gly)<br><i>FLT3</i> NM_004119.2:c.2503G>T(p.Asp835Tyr)                                                                                   | v.2           | 55       | 0.09<br>0.18         | 1098x<br>1101x         | LO<br>O       | 1 D<br>1 T        |
| HRL 2      | B-ALL   | R      | normal                 | N/A              | -                                                                                                               | NO                  | <i>KRAS</i> NM_004985.4:c.34G>T(p.Gly12Cys)<br><i>NTSC2</i> NM_012229.4:c.1100G>A(p.Arg367Gln)                                                                                     | v.1           | 12       | 0.13<br>0.07         | 516x<br>676X           | O<br>LO       | 2 T<br>2 P        |
| HRL 3      | B-ALL   | R      | complex                | NO               | Del. in <i>CDKN2A/B</i> , <i>PAX5</i> , <i>MLLT3</i> , <i>MTAP</i> .<br>Dup. in <i>ABL1</i> and <i>NUP214</i> . | NO                  | <i>PTPN11</i> NM_002834.4:c.205G>A(p.Glu69Lys)                                                                                                                                     | v.2           | 33       | 0.10                 | 1501x                  | O             | 2 D               |
| HRL 4      | B-ALL   | D      | normal                 | NO               | -                                                                                                               | -                   | NO                                                                                                                                                                                 | v.1           | 88       | -                    | -                      | -             | -                 |
| HRL 4      | B-ALL   | r      | normal                 | NO               | Del. in <i>CDKN2A/B</i> , and <i>IKZF1</i> .                                                                    | <i>CRLF2</i>        | NO                                                                                                                                                                                 | v.1           | 52       | -                    | -                      | -             | -                 |
| HRL 5      | T-ALL   | R      | N/A                    | N/A              | -                                                                                                               | -                   | <i>FBXW7</i> NM_018315.4:c.1273C>T(p.Arg425Cys)<br><i>NOTCH1</i> NM_017617.4:c.5033T>C(p.Leu1678Pro)<br><i>AKT1</i> NM_001014432.1:c.49G>A(p.Glu17Lys)                             | v.1           | 19       | 0.06<br>0.06<br>0.07 | 1274x<br>901x<br>1366x | O<br>LO<br>O  | 1 P<br>1 P<br>2 T |
| HRL 6      | B-ALL   | R      | hypodiploid            | NO               | -                                                                                                               | -                   | NO                                                                                                                                                                                 | v.2           | 2        | -                    | -                      | -             | -                 |
| HRL 7      | AML     | D      | normal                 | NO               | -                                                                                                               | <i>WT1</i>          | <i>FLT3</i> NM_004119.2:c.2503_2506delinsC, p.Asp835_Ile836delinsLeu<br><i>WT1</i> NM_024426.4:c.1372C>T(p.Arg458*)                                                                | v.2           | 50       | 0.35<br>0.42         | 1175x<br>1325x         | O<br>LO       | 1 T<br>1 P        |
| HRL 7      | AML     | R      | normal                 | NO               | -                                                                                                               | <i>WT1</i>          | <i>FLT3</i> NM_004119.2:c.2503_2506delinsC, p.Asp835_Ile836delinsLeu<br><i>WT1</i> NM_024426.4:c.1372C>T(p.Arg458*)                                                                | v.2           | 70       | 0.89<br>0.95         | 823x<br>1018x          | O<br>LO       | 1 T<br>1 P        |
| HRL 8      | AML     | R      | normal                 | NO               | -                                                                                                               | -                   | NO                                                                                                                                                                                 | v.2           | 35       | -                    | -                      | -             | -                 |
| HRL 9      | T-ALL   | D      | normal                 | NO               | -                                                                                                               | -                   | <i>PTEN</i> NM_000314.6:c.737_738insTGAA(p.Leu247fs)<br><i>PTEN</i> NM_000314.6:c.388C>G(p.Arg130Gly)                                                                              | v.1           | 84       | 0.06<br>0.66         | 1037x<br>1017x         | LO<br>O       | 2 T<br>2 T        |
| HRL 9      | T-ALL   | R      | normal                 | NO               | Del. in <i>CDKN2A/B</i> , <i>MLLT3</i> , <i>MTAP</i> and <i>PTEN</i> .                                          | <i>CRLF2</i>        | <i>PTEN</i> NM_000314.6:c.388C>G(p.Arg130Gly)                                                                                                                                      | v.2           | 71       | 0.59                 | 884x                   | O             | 2 T               |
| HRL 10     | B-ALL   | D      | normal                 | NO               | -                                                                                                               | -                   | <i>PTPN11</i> NM_002834.4:c.226G>A(p.Glu76Lys)                                                                                                                                     | v.2           | 78       | 0.29                 | 108x                   | O             | 2 D               |
| HRL 10     | B-ALL   | r      | normal                 | NO               | Del. in <i>PAX5</i> , <i>IKZF1</i> , <i>CDKN2A/B</i> .                                                          | <i>CRLF2</i>        | <i>PTPN11</i> NM_002834.4:c.226G>A(p.Glu76Lys)<br><i>KMT2D</i> NM_003482.3:c.15289C>T(p.Arg5097*)                                                                                  | v.2           | 65       | 0.28<br>0.05         | 289x<br>905x           | O<br>O        | 2 D<br>2 D        |
| HRL 11     | AML     | R      | normal                 | NO               | -                                                                                                               | <i>WT1</i>          | <i>WT1</i> NM_024426.4:c.1137_1141dupACGGT(p.Ser381fs)<br><i>KMT2D</i> NM_003482.3:c.1349_1350insAA(p.Pro451fs)<br><i>FLT3</i> NM_004119.2:c.1779_1832dup(p.Glu611fs) <sup>2</sup> | v.2           | 40       | 0.29<br>0.20<br>-    | 1180x<br>1728x<br>-    | LO<br>LO<br>O | 1 P<br>2 D<br>1 T |
| HRL 12     | B-ALL   | R      | N/A                    | N/A              | -                                                                                                               | -                   | <i>KRAS</i> NM_004985.4:c.38G>A(p.Gly13Asp)<br><i>ATRX</i> NM_000489.4:c.4868T>G(p.Leu1623*)                                                                                       | v.2           | 100      | 0.50<br>0.97         | 373x<br>281x           | O<br>LO       | 2 T<br>2 D        |
| HRL 13     | B-ALL   | R      | normal                 | NO               | Del. in <i>IKZF1</i> , <i>BTG1</i> and X chromosome.                                                            | NO                  | NO                                                                                                                                                                                 | v.2           | 60       | -                    | -                      | -             | -                 |

|        |       |                |              |                               |                                                                                              |    |                                                                                                                                                                                                          |     |    |                              |                                 |                     |                          |
|--------|-------|----------------|--------------|-------------------------------|----------------------------------------------------------------------------------------------|----|----------------------------------------------------------------------------------------------------------------------------------------------------------------------------------------------------------|-----|----|------------------------------|---------------------------------|---------------------|--------------------------|
| HRL 14 | B-ALL | D              | normal       | <i>KMT2A-MLLT1 (MLL1-ENL)</i> | No CNVs                                                                                      | NO | NO                                                                                                                                                                                                       | v.2 | 90 | -                            | -                               | -                   | -                        |
| HRL 14 | B-ALL | R              | normal       | <i>KMT2A-MLLT1 (MLL1-ENL)</i> | No CNVs                                                                                      | NO | <b>MPL</b> NM_005373.2:c.1642delG(p.Ala548fs)                                                                                                                                                            | v.2 | 59 | 0.13                         | 399x                            | LO                  | 2 D                      |
| HRL 15 | B-ALL | R              | hyperdiploid | <i>ETV6-RUNX1</i>             | Del. in <i>ETV6</i> .                                                                        | NO | NO                                                                                                                                                                                                       | v.2 | 40 | -                            | -                               | -                   | -                        |
| HRL 16 | T-ALL | R              | hyperdiploid | NO                            | Del. in <i>CDKN2A/B</i> locus ( <i>MTAP</i> , <i>PHF6</i> ). Dup. in <i>AHI1</i> .           | NO | <b>PHF6</b> NM_032458.2:c.903C>A(p.Tyr301*)<br><b>WT1</b> NM_024426.4:c.1128_1129insGGATATCG(p.Thr377fs)                                                                                                 | v.2 | 54 | 0.68<br>0.28                 | 1266x<br>1539x                  | LO<br>LO            | 1 D<br>2 P               |
| HRL 17 | B-ALL | D              | normal       | <i>E2A-other</i>              | -                                                                                            | -  | <b>SUZ12</b> NM_015355.3:c.456-2A>T<br><b>NRAS</b> NM_002524.4:c.183A>C(p.Gln61His)<br><b>NRAS</b> NM_002524.4:c.38G>A(p.Gly13Asp)                                                                       | v.2 | 58 | 0.06<br>0.19<br>0.07         | 301x<br>1365x<br>1589x          | LO<br>O<br>O        | 2 D<br>2 T<br>2 T        |
| HRL 17 | B-ALL | r              | normal       | <i>E2A-other</i>              | Del. in <i>PAX5</i> and <i>CDKN2A/B</i> .                                                    | NO | <b>NRAS</b> NM_002524.4:c.183A>C(p.Gln61His)                                                                                                                                                             | v.2 | 65 | 0.28                         | 1884x                           | O                   | 2 T                      |
| HRL 18 | B-ALL | D              | normal       | <i>BCR-ABL1</i>               | Del. in <i>JAK2</i> and <i>PAX5</i> . Dup. in <i>SHOX</i> , <i>CRLF2</i> and <i>CSF2RA</i> . | NO | NO                                                                                                                                                                                                       | v.2 | 65 | -                            | -                               | -                   | -                        |
| HRL 19 | B-ALL | R              | hyperdiploid | <i>ETV6-RUNX1</i>             | Del. in <i>ETV6</i> . Dup. in <i>SHOX</i> and <i>CRLF2</i> .                                 | NO | NO                                                                                                                                                                                                       | v.2 | 60 | -                            | -                               | -                   | -                        |
| HRL 20 | B-ALL | R              | N/A          | N/A                           | Del. in <i>CDKN2A</i> . Dup. in <i>PAX5</i> .                                                | NO | <b>KRAS</b> NM_004985.4:c.191_192insTGTTAACCAGTA(p.Tyr64_Ser65insValAsnGlnTyr)                                                                                                                           | v.1 | 88 | 0.19                         | 317x                            | LO                  | 2 T                      |
| HRL 21 | B-ALL | D              | hyperdiploid | NO                            | -                                                                                            | NO | <b>NRAS</b> NM_002524.4:c.181C>A(p.Gln61Lys)                                                                                                                                                             | v.1 | 95 | 0.40                         | 226x                            | O                   | 2 T                      |
| HRL 22 | B-ALL | D              | normal       | <i>BCR-ABL1</i>               | -                                                                                            | -  | NO                                                                                                                                                                                                       | v.1 | 81 | -                            | -                               | -                   | -                        |
| HRL 22 | B-ALL | R              | normal       | <i>BCR-ABL1</i>               | -                                                                                            | NO | NO                                                                                                                                                                                                       | v.2 | 42 | -                            | -                               | -                   | -                        |
| HRL 23 | B-ALL | R              | N/A          | N/A                           | Del. in <i>IKZF1</i> .                                                                       | NO | NO                                                                                                                                                                                                       | v.1 | 93 | -                            | -                               | -                   | -                        |
| HRL 24 | B-ALL | R <sup>1</sup> | hyperdiploid | NO                            | -                                                                                            | -  | <b>PTPN11</b> NM_002834.4:c.182A>T(p.Asp61Val)<br><b>MSH6</b> NM_000179.2:c.402dupT(p.Asp135fs)<br><b>CREBBP</b> NM_004380.2:c.4506G>C(p.Trp1502Cys)<br><b>NT5C2</b> NM_012229.4:c.713G>A(p.Arg238Gln)   | v.2 | 81 | 0.37<br>0.09<br>0.38<br>0.25 | 1790X<br>2430X<br>4155X<br>976X | O<br>LO<br>LO<br>LO | 2 D<br>2 P<br>2 D<br>2 P |
| HRL 24 | B-ALL | R <sup>2</sup> | normal       | NO                            | -                                                                                            | -  | <b>PTPN11</b> NM_002834.4:c.182A>T(p.Asp61Val)<br><b>CREBBP</b> NM_004380.2:c.4506G>C(p.Trp1502Cys)<br><b>CDKN2A</b> NM_058195.3:c.319dupC(p.His107fs)<br><b>NT5C2</b> NM_012229.4:c.713G>A(p.Arg238Gln) | v.2 | 84 | 0.42<br>0.46<br>0.08<br>0.46 | 713x<br>636x<br>1106x<br>856x   | O<br>LO<br>LO<br>LO | 2 D<br>2 D<br>2 T<br>2 P |

|        |       |   |              |                    |         |              |                                                                                                                                                                |     |    |                      |                        |               |                   |
|--------|-------|---|--------------|--------------------|---------|--------------|----------------------------------------------------------------------------------------------------------------------------------------------------------------|-----|----|----------------------|------------------------|---------------|-------------------|
| HRL 25 | B-ALL | D | normal       | <i>KMT2A-other</i> | No CNVs | NO           | NO                                                                                                                                                             | v.2 | 90 | -                    | -                      | -             | -                 |
| HRL 25 | B-ALL | R | normal       | NO                 | No CNVs | NO           | NO                                                                                                                                                             | v.2 | 60 | -                    | -                      | -             | -                 |
| HRL 26 | T-ALL | D | normal       | NO                 | No CNVs | -            | <i>PHF6</i> NM_032458.2:c.121_122insTCCCTTCTCCTCG(p.Ala41fs)<br><i>PTEN</i> NM_000314.6:c.696dupA(p.Arg233fs)<br><i>PTEN</i> NM_000314.6:c.740T>C(p.Leu247Ser) | v.2 | 77 | 0.41<br>0.35<br>0.33 | 299x<br>1389x<br>1580x | LO<br>LO<br>O | 1 D<br>2 T<br>2 T |
| HRL 26 | T-ALL | R | hyperdiploid | NO                 | No CNVs | <i>CRLF2</i> | <i>PHF6</i> NM_032458.2:c.121_122insTCCCTTCTCCTCG(p.Ala41fs)<br><i>PTEN</i> NM_000314.6:c.696dupA(p.Arg233fs)                                                  | v.2 | 87 | 0.44<br>0.88         | 637x<br>1855x          | LO<br>LO      | 1 D<br>2 T        |

ID: Identity; CVAs: Copy Number Alterations; NGS: Next Generation Sequencing; VAF: Variant Allele Frequency; MPL: Mixed Phenotype Acute Leukaemia; B-ALL: B-cell-precursor Acute Lymphoblastic Leukaemia; T-ALL: T-cell-precursor Acute Lymphoblastic Leukaemia; AML: Acute Myeloid Leukaemia; D: diagnosis; R: relapsed; r: refractory; Del.: deletion; Dup.: duplication; LO: Likely Oncogenic; O: Oncogenic; P: prognostic; T: therapeutic; 1: first relapse; 2: second relapse

<sup>1</sup> Karyotype: Hyperdiploid karyotype is considered if  $\geq 47$  chromosomes and hypodiploid if  $\leq 45$  chromosomes. Complex karyotype is defined by the presence of  $\geq 3$  cytogenetic alterations.

<sup>2</sup> VAF and depth are available for SNPs and indels, but not for internal tandem duplications (ITD)
