# Supplementary material for: Advanced Molecular Characterisation in Relapsed and Refractory Paediatric Acute Leukaemia, the Key for Personalised Medicine
Source: MDPI journal article supplement (doi:10.3390/jpm12060881), 2022-05-27
Supplement: s1 [file s1]

**Supplementary Table S2:** Summary of clinical data of the patients

| ID     | SEX | AGE DX | DISEASE | CNS DX | FIRST TREATMENT PROTOCOL                                                       | RISK GROUP DX | CR AFTER INDUCTION | HSCT IN 1 <sup>st</sup> CR | R/r                  | RELAPSE LOCALIZATION    | AGE AT R/r | r/R TREATMENT                                                        | EXITUS | CAUSE OF EXITUS | FOLLOW UP (MONTHS) |
|--------|-----|--------|---------|--------|--------------------------------------------------------------------------------|---------------|--------------------|----------------------------|----------------------|-------------------------|------------|----------------------------------------------------------------------|--------|-----------------|--------------------|
| HRL 1  | F   | 13     | MPL     | 1      | LAL-SEHOP-PETHEMA-2013                                                         | High          | NO <sup>1</sup>    | YES                        | r                    | -                       | 13         | CHEMOTHERAPY (MYELOID SCHEMA) + HSCT                                 | YES    | TRM             | 7,4                |
| HRL 2  | F   | 1      | B-ALL   | 1      | LAL-SEHOP-PETHEMA-2013                                                         | Intermediate  | YES                | NO                         | R                    | BM                      | 9          | CHEMOTHERAPY (LAL-SEHOP-PETHEMA-2015 RECAÍDAS) + HSCT + TRAMETINIB   | YES    | PROGRESSION     | 49                 |
| HRL 3  | M   | 2      | B-ALL   | 1      | LAL-SHOP-2005                                                                  | Standard      | YES                | NO                         | R                    | BM                      | 11         | CHEMOTHERAPY (SEHOP-PETHEMA-2015 RECAÍDAS)                           | NO     | -               | 154,6              |
| HRL 4  | M   | 8      | B-ALL   | 1      | LAL-SEHOP-PETHEMA-2013                                                         | Intermediate  | NO                 | YES                        | r <sup>2</sup>       | -                       |            | CHEMOTHERAPY (LAL-SEHOP-PETHEMA-2013) + RUXOLITINIB + HSCT           | NO     | -               | 42,5               |
| HRL 5  | M   | 13     | T-ALL   | 1      | LAL-SEHOP-PETHEMA-2013                                                         | Intermediate  | YES                | NO                         | R                    | BM                      | 15         | CHEMOTHERAPY (LAL-SEHOP-PETHEMA-2015 RECAÍDAS)                       | N/A    | N/A             | -                  |
| HRL 6  | M   | 2      | B-ALL   | 1      | LAL-SEHOP-PETHEMA-2013                                                         | Intermediate  | YES                | NO                         | R                    | Combined (BM and teste) | 4          | CHEMOTHERAPY (LAL-SEHOP-PETHEMA 2015 RCEAÍDAS) + HSCT                | NO     | -               | 63,7               |
| HRL 7  | F   | 12     | AML     | 1      | NOPHO-2012                                                                     | Standard      | NO                 | YES                        | r and R <sup>3</sup> | BM                      | 12         | SALVAGE CHEMOTHERAPY + SUNITINIB + HSCT                              | NO     | -               | 37,7               |
| HRL 8  | F   | 0      | AML     | 1      | LANL-SHOP-2007                                                                 | High          | YES                | NO                         | R                    | BM                      | 1          | SALVAGE CHEMOTHERAPY + HSCT                                          | NO     | -               | 123                |
| HRL 9  | M   | 0      | T-ALL   | 1      | INFERFANT-06                                                                   | Low           | YES                | YES                        | R                    | BM                      | 1          | SALVAGE CHEMOTHERAPY + NKS INFUSSION                                 | YES    | PROGRESSION     | 6                  |
| HRL 10 | M   | 15     | B-ALL   | 1      | LAL-SEHOP-PETHEMA-2013                                                         | Intermediate  | NO                 | AWB <sup>4</sup>           | r                    | -                       | 15         | SALVAGE CHEMOTHERAPY + RUXOLITINIB + HSCT                            | YES    | TRM             | 12                 |
| HRL 11 | M   | 12     | AML     | 1      | NOPHO-2012                                                                     | High          | YES                | YES                        | R                    | BM                      | 14         | SALVAGE CHEMOTHERAPY + QUIZARTINIB* + HSCT                           | YES    | TRM             | 35,4               |
| HRL 12 | M   | 9      | B-ALL   | 3      | LLA del Grupo Cooperativo Nacional de Venezuela (adapted from ALL Dana Farber) | High          | YES                | NO                         | R                    | Extramedullary (CNS)    | 10         | INTRATHECAL CHEMOTHERAPY                                             | NO     | -               | 52,6               |
| HRL 13 | M   | 16     | B-ALL   | 3      | LAL-SEHOP-PETHEMA-2013                                                         | Intermediate  | YES                | YES                        | R                    | BM                      | 19         | CART-19                                                              | NO     | -               | 55,4               |
| HRL 14 | F   | 0      | B-ALL   | 1      | INFERFANT-06                                                                   | Intermediate  | YES                | YES                        | R                    | Combined (BM and CNS)   | 0          | CART- 19                                                             | NO     | -               | 29,5               |
| HRL 15 | M   | 7      | B-ALL   | 1      | AHOPCA-2010                                                                    | High          | YES                | NO                         | R                    | Combined (BM and CNS)   | 11         | CHEMOTHERAPY (LAL-SEHOP-PETHEMA-2015 RECAÍDAS) + BLINATUMOMAB + HSCT | NO     | -               | 80,3               |
| HRL 16 | M   | 7      | T-ALL   | 2      | AHOPCA-2015                                                                    | High          | YES                | NO                         | R                    | BM                      | 10         | CHEMOTHERAPY (LAL-SEHOP-PETHEMA-2015 RECAÍDAS) + HSCT + RIBOCICLIB   | YES    | TRM             | 69                 |
| HRL 17 | F   | 9      | B-ALL   | 1      | LAL-SEHOP-PETHEMA-2013                                                         | Intermediate  | NO                 | NO                         | r                    | -                       | 9          | SALVAGE CHEMOTHERAPY + TRAMETINIB + CART-19                          | YES    | PROGRESSION     | 10,5               |
| HRL 18 | M   | 5      | B-ALL   | 1      | LAL-SEHOP-PETHEMA-2013                                                         | Standard      | YES                | NO                         | R                    | Extramedullary (teste)  | 8          | CHEMOTHERAPY (LAL-SEHOP-PETHEMA-2015 RECAÍDAS) + RADIOTHERAPY        | NO     | -               | 79                 |
| HRL 19 | M   | 3      | B-ALL   | 1      | LAL-SEHOP-PETHEMA-2013                                                         | Intermediate  | YES                | NO                         | R                    | BM                      | 8          | CHEMOTHERAPY (LAL-SEHOP-PETHEMA-2015 RECAÍDAS)                       | NO     | -               | 92                 |
| HRL 20 | M   | 2      | B-ALL   | 1      | LAL-SHOP-2005                                                                  | Standard      | YES                | NO                         | R                    | BM                      | 12         | CHEMOTHERAPY (LAL-SEHOP-PETHEMA-2015 RECAÍDAS) + HSCT                | NO     | -               | 109,5              |

|        |   |    |       |   |                                          |              |     |     |   |                       |    |                                                                    |     |             |      |
|--------|---|----|-------|---|------------------------------------------|--------------|-----|-----|---|-----------------------|----|--------------------------------------------------------------------|-----|-------------|------|
| HRL 21 | F | 7  | B-ALL | 1 | LAL-SEHOP-PETHEMA-2013                   | Standard     | YES | NO  | R | Extramedullary (skin) | 9  | CHEMOTHERAPY (LAL-SEHOP-PETHEMA-2015 RECAÍDAS) + HSCT              | YES | cGvHD       | 36,5 |
| HRL 22 | M | 12 | B-ALL | 1 | LAL-SEHOP-PETHEMA-2013                   | High         | YES | NO  | R | BM                    | 18 | CHEMOTHERAPY (LAL-SEHOP-PETHEMA-2015 RECAÍDAS) + DASATINIB + HSCT  | NO  | -           | 86   |
| HRL 23 | F | 5  | B-ALL | 1 | Children Boston Hospital and Dana Farber | Low          | YES | NO  | R | BM                    | 15 | CHEMOTHERAPY (LAL-SEHOP-PETHEMA-2015 RECAÍDAS) + HSCT              | YES | PROGRESSION | 48,5 |
| HRL 24 | M | 3  | B-ALL | 1 | LAL-SEHOP-PETHEMA-2013                   | Standard     | YES | NO  | R | BM                    | 3  | CHEMOTHERAPY (LAL-SEHOP-PETHEMA-2015 RECAÍDAS) + HSCT + RIBOCICLIB | NO  | -           | 53   |
| HRL 25 | F | 0  | B-ALL | 1 | INFERFANT-06                             | Intermediate | YES | YES | R | BM                    | 1  | CHEMOTHERAPY (LAL-SEHOP-PETHEMA-2015 RECAÍDAS) + HSCT              | NO  | -           | 19,6 |
| HRL 26 | M | 6  | T-ALL | 1 | LAL-SEHOP-PETHEMA-2013                   | Intermediate | YES | YES | R | Combined (BM and CNS) | 7  | SALVAGE CHEMOTHERAPY + HSCT                                        | YES | PROGRESSION | 10   |

ID: Patient Identity; DX: Diagnosis; CNS Dx: Central Nervous System Involvement at Diagnosis; CR: Complete Remission; HSCT: Hematopoietic Stem Cell Transplantation; R: Relapsed; r: Refractory; M: Male; F: Female; MPL: Mixed Phenotype Leukaemia; B-ALL: B-cell-progenitor Acute Lymphoblastic Leukaemia; T-ALL: T-cell-progenitor Acute Lymphoblastic Leukaemia; AML: Acute Myeloid Leukaemia; CNS-1: absence of blast in cerebrospinal fluid; CNS-2: blasts & < 5 white cells/μL in cerebrospinal fluid; CNS-3: blasts & > 5 white cells/μL in cerebrospinal fluid; BM: Bone Marrow; CNS: Central Nervous System; TRM: Transplant-related Mortality; cGvHD: Chronic Graft Versus Host Disease; AWB: aplasia without blasts.

<sup>1</sup> HRL 1 diagnosed with MPL received as first line induction treatment a lymphoid-polychemotherapy scheme, with a refractory and progressive disease. Then, a second line treatment with a myeloid-polychemotherapy scheme was given, achieving CR. After that, HSCT was performed.

<sup>2</sup> HRL 4 was diagnosed with B-ALL. Conventional induction treatment was started, and after evaluation, patient was diagnosed with an induction failure. In this moment, HRL 4 continued first-line treatment plus ruxolitinib, achieving after that CR. HSCT was then performed.

<sup>3</sup> HRL 7 diagnosed with AML, suffered a refractory disease. Salvage chemotherapy plus sunitinib was given. After that, patient achieved CR and HSCT was performed. A year later, and 4 months after sunitinib discontinuation, HRL 7 suffered a relapse.

<sup>4</sup> HRL 10 underwent to HSCT in aplasia without blast status after salvage chemotherapy because of the high risk of the disease.

\*Clinical Trial NCT03793478.
